# Supplementary material for: Metal-free photoinduced electron transfer–atom transfer radical polymerization (PET–ATRP) via a visible light organic photocatalyst
Source: Royal Society of Chemistry journal article supplement (doi:10.1039/c5py01765c), 2015-11-26
Supplement: c5py01765c1.pdf [file c5py01765c1.pdf]

Supplementary Information

For

# Metal-Free Photoinduced Electron Transfer - Atom Transfer Radical Polymerization (PET-ATRP) via a Visible Light Organic Photocatalyst†

Xiaodong Liu, Lifen Zhang,\* Zhenping Cheng\* and Xiulin Zhu

*Suzhou key Laboratory of Macromolecular Design and Precision Synthesis, Jiangsu Key Laboratory of Advanced Functional Polymer Design and Application, Department of Polymer Science and Engineering, College of Chemistry, Chemical Engineering and Materials Science, Soochow University, Suzhou 215123, China.*

**Table S1.** Effects of light source type on metal-free ATRP of MMA.<sup>[a]</sup>

| Entry             | Light source      | $[M]_0/[EBPA]_0$<br>$/[FL]_0/[Et_3N]_0$ | Time<br>(h) | Conv.<br>(%) | $M_{n,th}$<br>(g/mol) | $M_{n,GPC}$<br>(g/mol) | $M_w/M_n$ | $F^*(EBPA)$<br>(%) |
|-------------------|-------------------|-----------------------------------------|-------------|--------------|-----------------------|------------------------|-----------|--------------------|
| 1                 | Blue LED          | 200/0/0.3/9                             | 12          | NA           | -                     | -                      | -         | -                  |
| 2                 | Blue LED          | 200/1/0/0                               | 12          | NA           | -                     | -                      | -         | -                  |
| 3                 | —                 | 200/1/0.3/9 <sup>[b]</sup>              | 12          | NA           | -                     | -                      | -         | -                  |
| 4                 | Blue LED          | 200/0/0.3/0                             | 12          | 2.6          | -                     | 62100                  | 1.92      | -                  |
| 5                 | Blue LED          | 200/1/0.2/6                             | 32          | 87.4         | 17740                 | 32700                  | 1.49      | 54.3               |
| 6                 | Blue LED          | 400/1/0.3/9                             | 20          | 90.5         | 36490                 | 40000                  | 1.60      | 91.2               |
| 7                 | Blue LED          | 400/1/0.4/12                            | 24          | 85.2         | 34360                 | 37500                  | 1.64      | 91.6               |
| 8                 | Purple LED        | 200/1/0.2/6                             | 4           | 48.1         | 9870                  | 45500                  | 1.48      | 21.7               |
| 9                 | Green LED         | 200/1/0.2/6                             | 4           | 62.8         | 12820                 | 47300                  | 1.47      | 27.1               |
| 10                | Green LED         | 200/1/0.4/12                            | 4           | 54.8         | 11220                 | 46300                  | 1.52      | 24.2               |
| 11                | Green LED         | 400/1/0.4/12                            | 4           | 55.5         | 22470                 | 43700                  | 1.46      | 51.4               |
| 12                | Green LED         | 400/1/0.8/24                            | 4           | 45.2         | 18340                 | 45500                  | 1.54      | 40.3               |
| 14                | Yellow LED        | 200/1/0.2/6                             | 22          | 18.6         | 3970                  | 179000                 | 1.57      | 2.2                |
| 15                | Incandescent lamp | 200/1/0.2/6                             | 0.5         | 15.6         | 3370                  | 29100                  | 1.34      | 11.6               |
| 16                | Incandescent lamp | 200/1/0.2/6                             | 1.5         | 42.3         | 8710                  | 29900                  | 1.40      | 29.1               |
| S1 <sup>[c]</sup> | Blue LED          | 100/1/0.1                               | 22          | 80.6         | 8310                  | 28500                  | 1.66      | 29.2               |

|                          |          |           |    |      |      |       |      |      |
|--------------------------|----------|-----------|----|------|------|-------|------|------|
| <b>S2</b> <sup>[c]</sup> | Blue LED | 100/1/0.2 | 22 | 79.9 | 8240 | 20400 | 1.78 | 40.4 |
|--------------------------|----------|-----------|----|------|------|-------|------|------|

<sup>[a]</sup> Polymerization conditions:  $V_{\text{MMA}} = 1.0$  mL,  $V_{\text{DMSO}} = 2.0$  mL; samples were irradiated by LED light at rt.  
<sup>[b]</sup> Polymerization performed in the dark. Theoretical number-average molecular weight  $M_{n,\text{th}} = M_{\text{EBPA}} + [\text{MMA}]_0/[\text{EBPA}]_0 \times \text{conversion} \times M_{\text{MMA}}$ . Initiator efficiency ( $I^*$ ) = theoretical number average molecular weight  $M_{n,\text{th}}$  / experimentally measured  $M_{n,\text{GPC}} \times 100$ .  
<sup>[c]</sup> Polymerization conditions:  $V_{\text{MMA}} = 1.0$  mL,  $V_{\text{DMA}} = 2.0$  mL; 10-phenylphenothiazine (PTH) was used as the photocatalyst; samples were irradiated by blue LED light at rt.

**Table S2.** Effects of acid and alkaline on the metal-free ATRP of MMA at  $[\text{MMA}]_0 : [\text{EBPA}]_0 = 200 : 1$ .

| Entry | $[\text{FL}]_0 / [\text{TEA}]_0$ | $[\text{FL}]_0 / [\text{Acetic Acid}]_0$ | Time (h) | Conv. (%) | $M_{n,\text{th}}$ (g/mol) | $M_{n,\text{GPC}}$ (g/mol) | $M_w/M_n$ | $I^*(\text{EBPA})$ (%) |
|-------|----------------------------------|------------------------------------------|----------|-----------|---------------------------|----------------------------|-----------|------------------------|
| 1     | 0.1/1                            | 0.1/0                                    | 1.5      | 27.2      | 5690                      | 26700                      | 1.43      | 21.3                   |
| 2     | 0.1/2                            | 0.1/0                                    | 1.5      | 29.5      | 6150                      | 24400                      | 1.41      | 25.2                   |
| 3     | 0.1/3                            | 0.1/0                                    | 1.5      | 31.0      | 6450                      | 24500                      | 1.41      | 26.3                   |
| 4     | 0.1/4                            | 0.1/0                                    | 1.5      | 27.1      | 5670                      | 22200                      | 1.45      | 25.5                   |
| 5     | 0.1/1                            | 0.1/0                                    | 2        | 39.5      | 8150                      | 27700                      | 1.50      | 29.4                   |
| 6     | 0.1/2                            | 0.1/0                                    | 2        | 41.6      | 8570                      | 26500                      | 1.48      | 32.3                   |
| 7     | 0.1/3                            | 0.1/0                                    | 2        | 41.1      | 8470                      | 25400                      | 1.44      | 33.3                   |
| 8     | 0.1/4                            | 0.1/0                                    | 2        | 42.9      | 8830                      | 24300                      | 1.51      | 36.3                   |
| 9     | 0.1/0                            | 0.1/0                                    | 2        | 6.4       | 1520                      | 58500                      | 2.54      | 2.6                    |
| 10    | 0.1/0                            | 0.1/1                                    | 4        | 23.0      | 4850                      | 57600                      | 1.86      | 8.4                    |
| 11    | 0.1/0                            | 0.1/2                                    | 4        | 17.5      | 3750                      | 55000                      | 2.04      | 6.8                    |
| 12    | 0.1/0                            | 0.1/3                                    | 4        | 14.5      | 3150                      | 56100                      | 2.50      | 5.6                    |
| 13    | 0.1/0                            | 0.1/4                                    | 4        | 16.9      | 3630                      | 61400                      | 2.17      | 5.9                    |

Polymerization conditions:  $[\text{MMA}]_0 : [\text{EBPA}]_0 : [\text{FL}]_0 : [\text{TEA or Acetic Acid}]_0 = 200 : 1 : 0.1 : x$ ,  $V_{\text{MMA}} = 1.0$  mL,  $V_{\text{DMSO}} = 2.0$  mL; samples were irradiated by a blue LED at rt.

**Table S3.** Effects of initiator type on metal-free ATRP of MMA.

| Entry | Initiator | Time (h) | Conv. (%) | $M_{n,\text{th}}$ (g/mol) | $M_{n,\text{GPC}}$ (g/mol) | $M_w/M_n$ | $I^*(\text{EBPA})$ (%) |
|-------|-----------|----------|-----------|---------------------------|----------------------------|-----------|------------------------|
| 1     | P-TsCl    | 12       | 49.4      | 10130                     | 79200                      | 1.73      | 12.8                   |
| 2     | EBiB      | 12       | 46.2      | 9490                      | 57000                      | 1.56      | 16.6                   |
| 3     | BPN       | 12       | 83.7      | 17000                     | 36200                      | 1.54      | 47.0                   |
| 4     | MBP       | 12       | 74.9      | 15200                     | 66200                      | 1.56      | 23.0                   |
| 5     | MCP       | 12       | 15.7      | 3390                      | 51700                      | 1.61      | 6.6                    |
| 6     | BPAN      | 12       | 20.2      | 4290                      | 37700                      | 3.49      | 11.4                   |
| 7     | EBPA      | 12       | 64.5      | 13160                     | 30700                      | 1.46      | 42.9                   |
| 8     | PEBr      | 12       | 35.8      | 7410                      | 83100                      | 1.67      | 8.9                    |

Polymerization conditions:  $[\text{MMA}]_0 : [\text{EBPA}]_0 : [\text{FL}]_0 : [\text{Et}_3\text{N}]_0 = 200 : 1 : 0.2 : 6$ ,  $V_{\text{MMA}} = 1.0$  mL,  $V_{\text{DMSO}} = 2.0$  mL; samples were irradiated by a blue LED at rt.

**Table S4.** Effects of conventional solvents and monomers on metal-free ATRP of MMA.

| Entry | Solvent | $[M]_0/[EBPA]_0$<br>$/[FL]_0/[Et_3N]_0$ | Time<br>(h) | Conv.<br>(%) | $M_{n,th}$<br>(g/mol) | $M_{n,GPC}$<br>(g/mol) | $M_w/M_n$ | $I^*(EBPA)$<br>(%) |
|-------|---------|-----------------------------------------|-------------|--------------|-----------------------|------------------------|-----------|--------------------|
| 1     | DMSO    | 100:1:0.1:3                             | 3           | 57.3         | 5980                  | 28400                  | 1.52      | 21.1               |
| 2     | DMSO    | 100:1:0.4:12                            | 4           | 20.3         | 2280                  | 13800                  | 1.53      | 16.5               |
| 3     | DMSO    | 200:1:0.2:6                             | 3           | 48.7         | 9990                  | 27200                  | 1.44      | 36.7               |
| 4     | Acetone | 100:1:0.1:3                             | 3           | 16.1         | 1860                  | 17200                  | 1.45      | 10.8               |
| 5     | Acetone | 200:1:0.2:6                             | 15          | 14.9         | 3230                  | 19600                  | 1.41      | 16.5               |
| 6     | Anisole | 100:1:0.1:3                             | 3           | 26.3         | 2880                  | 21900                  | 1.42      | 13.2               |
| 7     | Anisole | 200:1:0.2:6                             | 15          | 10.1         | 2270                  | 20700                  | 1.26      | 11.0               |
| 8     | DMA     | 100:1:0.1:3                             | 3           | 50.0         | 5250                  | 22300                  | 1.44      | 23.5               |
| 9     | DMA     | 200:1:0.2:6                             | 15          | 31.0         | 6450                  | 18500                  | 1.43      | 34.9               |
| 10    | DMF     | 100:1:0.1:3                             | 3           | 38.1         | 4060                  | 20300                  | 1.46      | 20.0               |
| 11    | DMF     | 200:1:0.2:6                             | 15          | 16.6         | 3570                  | 19200                  | 1.27      | 18.6               |

Polymerization conditions:  $V_{MMA} = 1.0$  mL,  $V_{Solvent} = 2.0$  mL; samples were irradiated by LED light at rt.

**Table S5.** Effect of the solvent volume on metal-free ATRP of MMA at  $[MMA]_0/[EBPA]_0/[FL]_0/[Et_3N]_0 = 200/1/0.3/9$ .

| Entry | $[M]_0/[EBPA]_0$<br>$/[FL]_0/[Et_3N]_0$ | Solvent<br>(ml) | Time<br>(h) | Conv.<br>(%) | $M_{n,th}$<br>(g/mol) | $M_{n,GPC}$<br>(g/mol) | $M_w/M_n$ | $I^*(EBPA)$<br>(%) |
|-------|-----------------------------------------|-----------------|-------------|--------------|-----------------------|------------------------|-----------|--------------------|
| 1     | 200/1/0.3/9                             | 1               | 1           | 34.4         | 7130                  | 25100                  | 1.39      | 28.4               |
| 2     | 200/1/0.3/9                             | 1               | 8           | 68.6         | 14000                 | 23500                  | 1.51      | 59.6               |
| 3     | 200/1/0.3/9                             | 2               | 3           | 20.0         | 4250                  | 18800                  | 1.27      | 22.6               |
| 4     | 200/1/0.3/9                             | 2               | 7           | 38.9         | 8030                  | 20800                  | 1.44      | 38.6               |
| 5     | 200/1/0.3/9                             | 2               | 35          | 77.2         | 15700                 | 27300                  | 1.66      | 57.5               |
| 6     | 200/1/0.3/9                             | 4               | 2           | 24.8         | 5210                  | 22600                  | 1.29      | 23.1               |
| 7     | 200/1/0.3/9                             | 4               | 9           | 54.5         | 11160                 | 26600                  | 1.41      | 42.0               |
| 8     | 200/1/0.3/9                             | 4               | 21          | 70.1         | 14280                 | 26900                  | 1.44      | 53.1               |

Polymerization conditions:  $[MMA]_0:[EBPA]_0:[FL]_0:[Et_3N]_0 = 200:1:0.3:9$ ,  $V_{MMA} = 1.0$  mL; samples were irradiated by LED light at rt.

**Table S6.** Effect of the solvent volume on metal-free ATRP of MMA at  $[MMA]_0:[EBPA]_0 = 400:1$ .

| Entry | $[M]_0/[EBPA]_0$<br>$/[FL]_0/[Et_3N]_0$ | Solvent<br>(ml) | Time (h) | Conv.<br>(%) | $M_{n,th}$<br>(g/mol) | $M_{n,GPC}$<br>(g/mol) | $M_w/M_n$ | $I^*(EBPA)$<br>(%) |
|-------|-----------------------------------------|-----------------|----------|--------------|-----------------------|------------------------|-----------|--------------------|
| 1     | 400/1/0.2/6                             | 2               | 2        | 44.9         | 18220                 | 37100                  | 1.61      | 49.1               |
| 2     | 400/1/0.2/6                             | 2               | 12       | 86.3         | 34800                 | 46500                  | 1.62      | 74.8               |
| 3     | 400/1/0.4/12                            | 1               | 1        | 21.5         | 8850                  | 21700                  | 1.31      | 40.8               |
| 4     | 400/1/0.4/12                            | 1               | 8        | 46.8         | 19000                 | 21700                  | 1.72      | 87.6               |
| 5     | 400/1/0.4/12                            | 2               | 1        | 20.9         | 8610                  | 25400                  | 1.39      | 33.9               |
| 6     | 400/1/0.4/12                            | 2               | 3        | 40.8         | 16580                 | 28600                  | 1.56      | 58.0               |
| 7     | 400/1/0.4/12                            | 2               | 24       | 85.2         | 32830                 | 37500                  | 1.64      | 87.5               |
| 8     | 400/1/0.4/12                            | 4               | 2        | 31.4         | 12820                 | 33600                  | 1.58      | 38.2               |
| 9     | 400/1/0.4/12                            | 4               | 9        | 63.2         | 25550                 | 36100                  | 1.51      | 70.8               |
| 10    | 400/1/0.8/24                            | 4               | 13       | 24.0         | 9850                  | 32600                  | 1.47      | 30.2               |
| 11    | 400/1/0.8/24                            | 4               | 38       | 58.6         | 23710                 | 34500                  | 1.51      | 68.7               |
| 12    | 400/1/1.2/36                            | 4               | 18       | 20.6         | 8490                  | 35100                  | 1.39      | 24.2               |
| 13    | 400/1/1.2/36                            | 4               | 42       | 53.9         | 21830                 | 37800                  | 1.54      | 57.8               |

Polymerization conditions:  $V_{MMA} = 1.0$  mL; samples were irradiated by LED light at rt.

**Table S7.** Effects of the molar ratio of  $[MMA]_0:[EBPA]_0$  on metal-free ATRP of MMA.

| Entry | $[M]_0/[EBPA]_0$<br>$/[FL]_0/[Et_3N]_0$ | Time<br>(h) | Conv.<br>(%) | $M_{n,th}$<br>(g/mol) | $M_{n,GPC}$<br>(g/mol) | $M_w/M_n$ | $I^*(EBPA)$<br>(%) |
|-------|-----------------------------------------|-------------|--------------|-----------------------|------------------------|-----------|--------------------|
| 1     | 500/1/1.0/30                            | 10          | 15.8         | 8150                  | 32000                  | 1.42      | 25.5               |
| 2     | 500/1/1.0/30                            | 30          | 57.8         | 29200                 | 37700                  | 1.53      | 77.5               |
| 3     | 600/1/1.2/36                            | 10          | 10.5         | 6550                  | 32000                  | 1.38      | 20.5               |
| 4     | 600/1/1.2/36                            | 30          | 51.6         | 31240                 | 38200                  | 1.56      | 81.8               |
| 5     | 800/1/1.6/48                            | 10          | 9.1          | 7530                  | 32000                  | 1.33      | 23.5               |
| 6     | 800/1/1.6/48                            | 30          | 39.2         | 31640                 | 36700                  | 1.53      | 86.2               |

Polymerization conditions:  $V_{MMA} = 1.0$  mL,  $V_{DMSO} = 2.0$  mL; samples were irradiated by LED light at rt.

**Table S8.** Effects of the content of fluorescein (FL) on metal-free ATRP of MMA at  $[MMA]_0/[EBPA]_0 = 100/1$ .

| Entry | Monomer | $[M]_0/[EBPA]_0$<br>$/[FL]_0/[Et_3N]_0$ | Time<br>(h) | Conv.<br>(%)        | $M_{n,th}$<br>(g/mol) | $M_{n,GPC}$<br>(g/mol) | $M_w/M_n$ |
|-------|---------|-----------------------------------------|-------------|---------------------|-----------------------|------------------------|-----------|
| 1     | MMA     | 100/1/0.1/3                             | 0.5         | 17.4                | 1990                  | 24400                  | 1.41      |
| 2     | MMA     | 100/1/0.1/3                             | 3           | 57.3                | 5980                  | 28400                  | 1.52      |
| 3     | MMA     | 100/1/0.1/3                             | 6           | 79.94               | 8250                  | 31900                  | 1.53      |
| 4     | MMA     | 100/1/0.2/6                             | 3           | 39.2                | 4170                  | 19500                  | 1.32      |
| 5     | MMA     | 100/1/0.2/6                             | 12          | 61.6                | 6410                  | 20300                  | 1.47      |
| 6     | St      | 200:1:0.2:6                             | 2           | 3.9                 | 1060                  | 6200                   | 1.35      |
| 7     | St      | 200:1:0.2:6                             | 6           | 10.1                | 2350                  | 8000                   | 1.56      |
| 8     | PEGMA   | 50:1:0.2:6                              | 16          | 78.2 <sup>[a]</sup> | 19790                 | 18900                  | 1.53      |
| 9     | AN      | 100:1:0.2:6                             | 7           | 25.2                | 1580                  | 12200                  | 1.79      |
| 10    | tBA     | 200:1:0.2:6                             | 10          | 72.1 <sup>[b]</sup> | 20750                 | 49300                  | 1.57      |
| 11    | GMA     | 200:1:0.2:6                             | 10          | 67.3                | 19380                 | 12100                  | 1.90      |
| 12    | BnMA    | 200:1:0.2:6                             | 10          | 72.8                | 25900                 | 23100                  | 1.89      |

<sup>[a]</sup> Calculated by <sup>1</sup>H NMR analysis. <sup>[b]</sup> Purified by the precipitation in methanol-water (2/1, v/v).

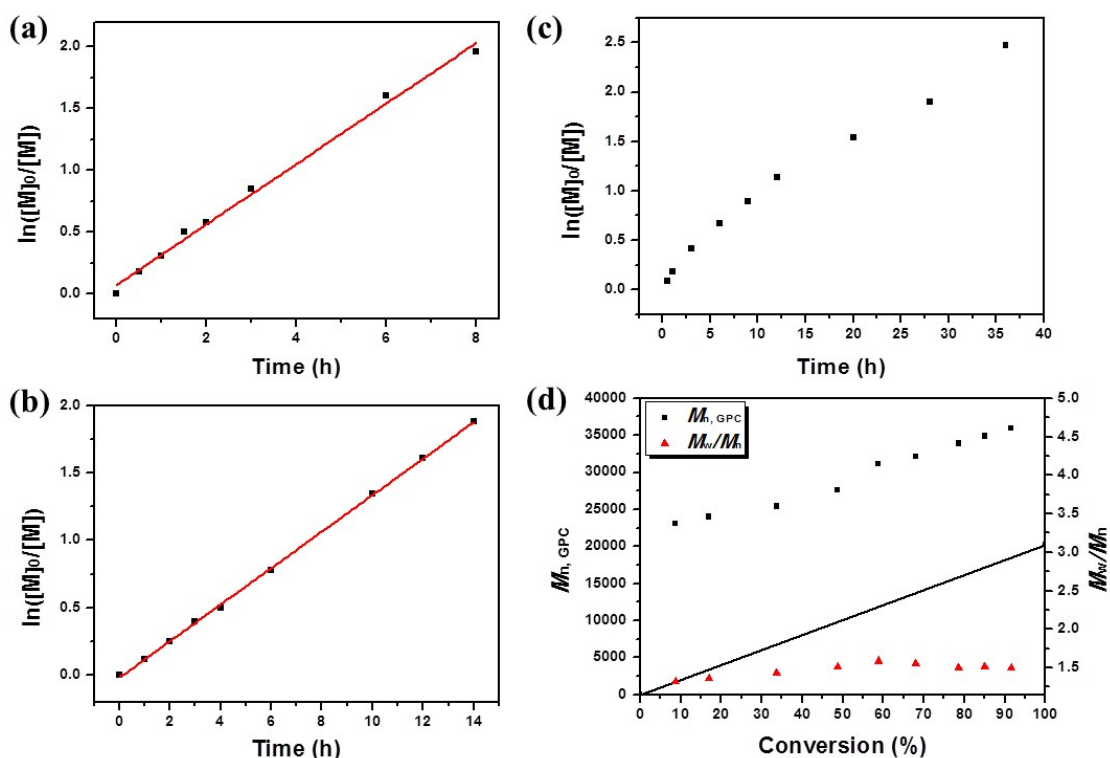

**Fig. S1**  $\ln([M]_0/[M])$  as a function of time for metal-free ATRP of MMA. Polymerization conditions: (a)  $[MMA]_0:[EBPA]_0:[FL]_0:[TEA]_0 = 100:1:0.1:3$ ,  $V_{MMA} = 1.0$  mL,  $V_{DMSO} = 2.0$  mL; (b)  $[MMA]_0:[EBPA]_0:[FL]_0:[Et_3N]_0 = 100:1:0.1:3$ ,  $V_{MMA} = 1.0$  mL,  $V_{DMF} = 2.0$  mL; samples were irradiated by a blue LED at rt.  $\ln([M]_0/[M])$  as a function of time (c) and number-average molecular weight ( $M_{n,GPC}$ ) and molecular weight distribution ( $M_w/M_n$ ) versus conversion (d) for metal-free ATRP of MMA. Polymerization conditions:  $[MMA]_0:[EBPA]_0:[FL]_0:[TEA]_0 = 200:1:0.25:7.5$ ,  $V_{MMA} = 1.0$  mL,  $V_{DMSO} = 2.0$  mL; samples were irradiated by a blue LED at rt.

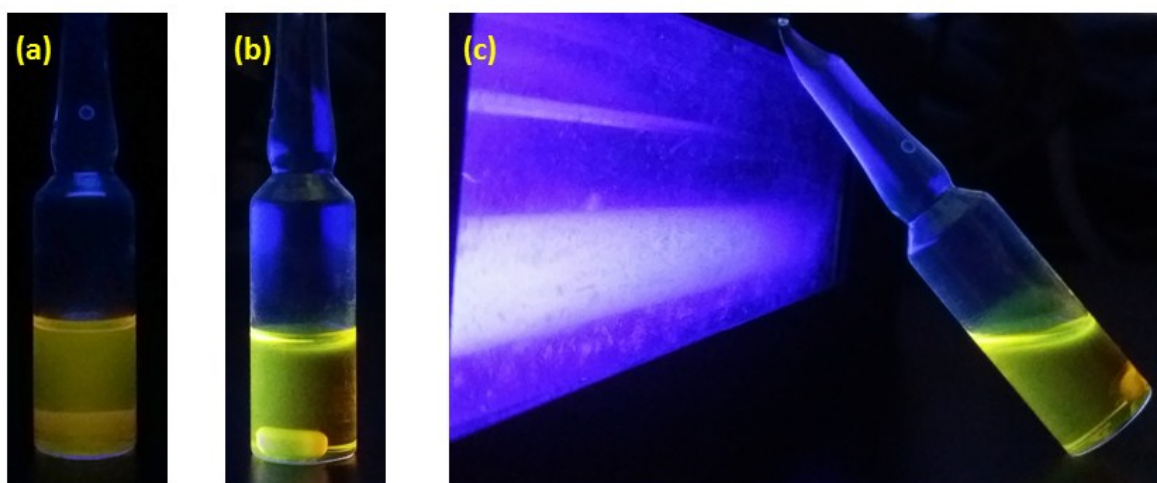

**Fig. S2** Photographs of reaction system before (a) and after (b, c) polymerization relating to entry 3 in Table S8 on excitation at 365 nm using a UV lamp.

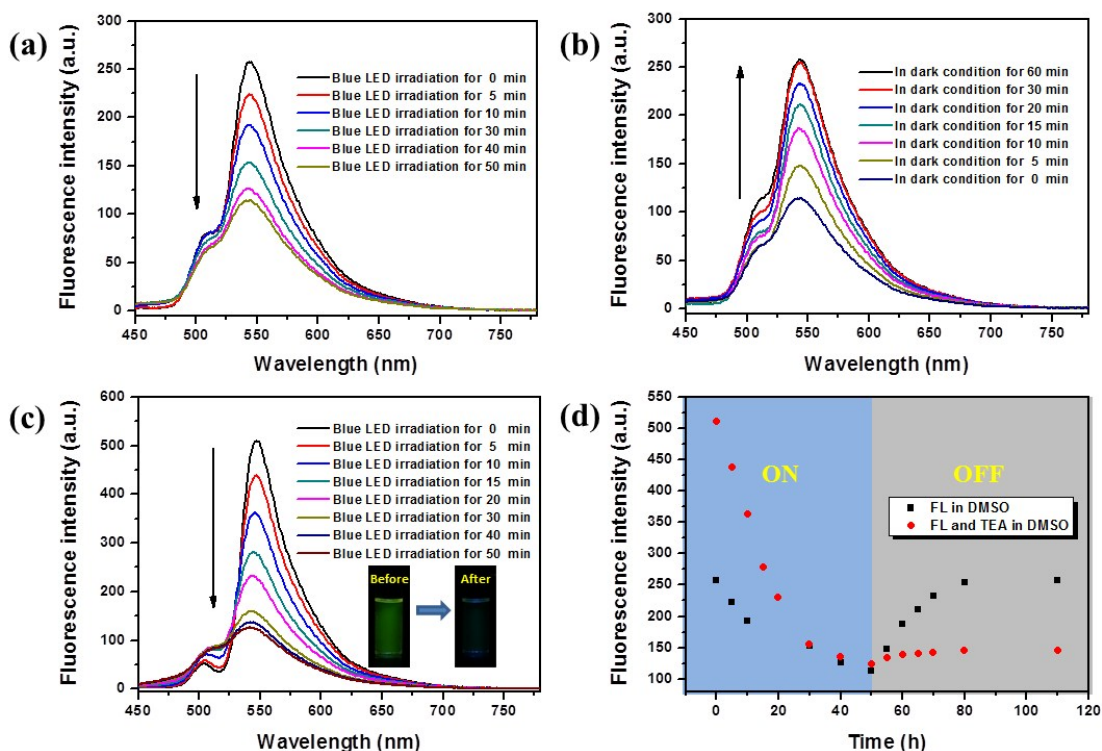

**Fig. S3** (a) Fluorescence spectra of FL in DMSO (0.1 mM) under varying time of blue LED irradiation; (b) fluorescence spectra of FL in DMSO (0.1 mM) changed to dark environment for varying time after 50 min of blue LED irradiation; (c) fluorescence quenching studies of a solution of FL (0.1 mM) and TEA (30 equiv.) in DMSO under varying time of blue LED irradiation. The inset shows the fluorescence changes of FL (0.1 mM) before and after blue LED irradiation for 50 min on excitation at 365 nm using a UV lamp; (d) time depended fluorescence intensity at 542 nm (FL in DMSO) and 546 nm (FL and TEA in DMSO) processed with “on-off” blue LED irradiation.

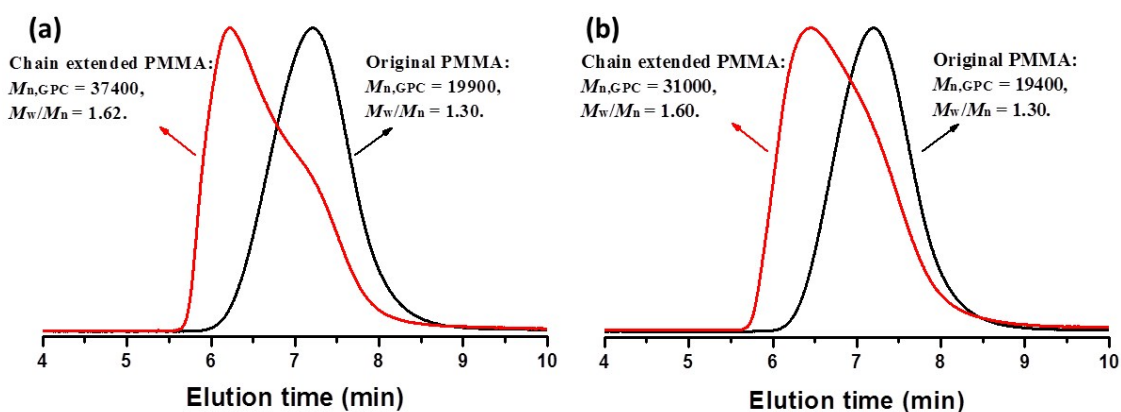

**Fig. S4** (a) GPC traces of PMMA before and after chain extension using PMMA prepared by metal-free ATRP of MMA as the macroinitiator ( $M_{n,GPC} = 19900 \text{ g mol}^{-1}$ ,  $M_w/M_n = 1.30$ ). (b) GPC traces of PMMA before and after chain extension using PMMA prepared by metal-free ATRP of MMA as the macroinitiator ( $M_{n,GPC} = 19400 \text{ g mol}^{-1}$ ,  $M_w/M_n = 1.30$ ).
